# Supplementary material for: State-Level Trends in the Prevalence of Autism Spectrum Disorder (ASD) from 2000 to 2012: A Reanalysis of Findings from the Autism and Developmental Disabilities Network
Source: Springer Nature journal article supplement (doi:10.1007/s10803-018-3568-z), 2018-04-13
Supplement: MOESM1 [file 15656426]

**Supplemental Table 1.** Results of regression analysis (model H)

|  |  |  | 95% Confidence Interval | |
| --- | --- | --- | --- | --- |
|  | Coefficient | Standard Error | Lower bound | Upper bound |
| Intercepts |  |  |  |  |
| Constant | -5. 740 | 0.249 | -6. 233 | -5. 255 |
| Arizona | 0.580 | 0.106 | 0.374 | 0.791 |
| Arkansas | 0.492 | 0.126 | 0.245 | 0.739 |
| Colorado | 0.479 | 0.169 | 0.149 | 0.810 |
| Georgia | 0.621 | 0.105 | 0.414 | 0.827 |
| Maryland | 0.444 | 0.113 | 0.223 | 0.665 |
| Missouri | 0.621 | 0.119 | 0.389 | 0.854 |
| New Jersey | 1.033 | 0.108 | 0.822 | 1.243 |
| North Carolina | 0.426 | 0.124 | 0.182 | 0.669 |
| South Carolina | 0.439 | 0.117 | 0.209 | 0.669 |
| Utah | 2.382 | 0.786 | 0.842 | 3.923 |
| Wisconsin | 0.368 | 0.125 | 0.123 | 0.613 |
| Slopes |  |  |  |  |
| yearsSince2000 | 0.057 | 0.014 | 0.030 | 0.085 |
| Arizona | 0.048 | 0.015 | 0.018 | 0.078 |
| Arkansas | 0.046 | 0.017 | 0.012 | 0.079 |
| Colorado | 0.006 | 0.021 | -0.035 | 0.047 |
| Georgia | 0.029 | 0.015 | -0.0004 | 0.059 |
| Maryland | 0.054 | 0.016 | 0.022 | 0.086 |
| Missouri | 0.033 | 0.017 | -0.0002 | 0.066 |
| New Jersey | 0.029 | 0.015 | -0.001 | 0.059 |
| North Carolina | 0.066 | 0.017 | 0.033 | 0.099 |
| South Carolina | 0.025 | 0.018 | -0.011 | 0.061 |
| Utah | -0.124 | 0.081 | -0.282 | 0.034 |
| Wisconsin | 0.007 | 0.018 | -0.028 | 0.041 |
| Change in slope, 2012 | |  |  |  |
| Constant: Year 2012 | 0.714 | 0.186 | 0.348 | 1.079 |
| Arizona | -0.368 | 0.102 | -0.568 | -0.168 |
| Arkansas | -0.482 | 0.124 | -0.725 | -0.240 |
| Colorado | -0.107 | 0.117 | -0.335 | 0.122 |
| Georgia | -0.156 | 0.097 | -0.345 | 0.033 |
| Maryland | -0.114 | 0.123 | -0.355 | 0.126 |
| Missouri | -0.506 | 0.115 | -0.731 | -0.280 |
| New Jersey | -0.094 | 0.099 | -0.289 | 0.101 |
| North Carolina | -0.316 | 0.102 | -0.516 | -0.116 |
| South Carolina | -0.153 | 0.138 | -0.423 | 0.117 |
| Utah | 0.029 | 0.202 | -0.367 | 0.426 |

| **Supplemental Table 2.** State-level difference in ASD prevalence in 2000: Results of Wald tests for final regression model (model H) | | | | | | | | | | | |
| --- | --- | --- | --- | --- | --- | --- | --- | --- | --- | --- | --- |
| State | Wiscon-sin | North Carolina | South Carolina | Mary-land | Colorado | Arkan-sas | Utah | Arizona | Georgia | Missouri | New Jersey |
| Alabama | 0.003** | 0.001*** | 0.000*** | 0.000*** | 0.005** | 0.000*** | 0.000*** | 0.000*** | 0.000*** | 0.000*** | 0.000*** |
| Wisconsin | -- | 0.60 | 0.49 | 0.43 | 0.48 | 0.27 | 0.08 | 0.02* | 0.004** | 0.01* | 0.000*** |
| North Carolina | | -- | 0.90 | 0.85 | 0.73 | 0.55 | 0.19 | 0.07 | 0.02* | 0.06 | 0.000*** |
| South Carolina | |  | -- | 0.95 | 0.79 | 0.61 | 0.20 | 0.07 | 0.02* | 0.052 | 0.000*** |
| Maryland |  |  |  | -- | 0.81 | 0.63 | 0.20 | 0.051 | 0.01* | 0.04* | 0.000*** |
| Colorado |  |  |  |  | -- | 0.94 | 0.54 | 0.48 | 0.33 | 0.35 | 0.000*** |
| Arkansas |  |  |  |  |  | -- | 0.46 | 0.32 | 0.15 | 0.22 | 0.000*** |
| Utah |  |  |  |  |  |  | -- | 0.98 | 0.68 | 0.71 | 0.000*** |
| Arizona |  |  |  |  |  |  |  | -- | 0.51 | 0.62 | 0.000*** |
| Georgia |  |  |  |  |  |  |  |  | -- | 0.99 | 0.000*** |
| Missouri |  |  |  |  |  |  |  |  |  | -- | 0.000*** |
| New Jersey |  |  |  |  |  |  |  |  |  |  | -- |
|  | | | | | | | | | | | |

Note. Wald tests compared differences between states in the sum of the model H intercept + the state-level intercept. Model projections are included for states that did not participate in data collection in the year 2000.

| **Supplemental Table 3.** State-level difference in growth in ASD prevalence, 2000-2010: Results of Wald tests for final regression model (model H) | | | | | | | | | | | |
| --- | --- | --- | --- | --- | --- | --- | --- | --- | --- | --- | --- |
| State | Colorado | Wiscon-sin | South Carolina | New Jersey | Georgia | Missouri | Arkan-sas | Arizona | Mary-land | Utah | North Carolina |
| Alabama | 0.78 | 0.71 | 0.18 | 0.06 | 0.053 | 0.05 | 0.007** | 0.002** | 0.001*** | 0.001*** | 0.000*** |
| Colorado | -- | 0.97 | 0.33 | 0.17 | 0.16 | 0.14 | 0.03* | 0.01* | 0.006** | 0.005** | 0.001** |
| Wisconsin |  | -- | 0.25 | 0.07 | 0.06 | 0.07 | 0.006** | 0.001*** | 0.000*** | 0.001*** | 0.000*** |
| South Carolina | |  | -- | 0.79 | 0.76 | 0.62 | 0.19 | 0.09 | 0.047* | 0.04* | 0.008** |
| New Jersey |  |  |  | -- | 0.96 | 0.72 | 0.14 | 0.026* | 0.01* | 0.02* | 0.001** |
| Georgia |  |  |  |  | -- | 0.74 | 0.14 | 0.025* | 0.01* | 0.02* | 0.001** |
| Missouri |  |  |  |  |  | -- | 0.35 | 0.18 | 0.09 | 0.07 | 0.01* |
| Arkansas |  |  |  |  |  |  | -- | 0.82 | 0.50 | 0.36 | 0.13 |
| Arizona |  |  |  |  |  |  |  | -- | 0.56 | 0.40 | 0.12 |
| Maryland |  |  |  |  |  |  |  |  | -- | 0.73 | 0.34 |
| Utah |  |  |  |  |  |  |  |  |  | -- | 0.61 |
| North Carolina | |  |  |  |  |  |  |  |  |  | -- |

Note. Wald tests compared differences between states in the sum of the model H coefficients representing the mean annual change between 2000 and 2010 + a state-level interaction with this variable.

| **Supplemental Table 4**. State-level difference in change in growth in ASD prevalence, 2010-2012: Results of Wald tests for final regression model (model H) | | | | | | | | | | | |
| --- | --- | --- | --- | --- | --- | --- | --- | --- | --- | --- | --- |
| State | Arkan-sas | Arizona | Utah | North Carolina | Georgia | South Carolina | Mary-land | Colorado | New Jersey | Alabama | Wiscon-sin |
| Missouri | 0.846 | 0.181 | 0.190 | 0.066 | 0.000*** | 0.011* | 0.002** | 0.001*** | 0.000*** | 0.000*** | 0.000*** |
| Arkansas | -- | 0.312 | 0.307 | 0.14 | 0.003** | 0.024* | 0.005** | 0.003** | 0.000*** | 0.000*** | 0.000*** |
| Arizona |  | -- | 0.914 | 0.554 | 0.01** | 0.092 | 0.023* | 0.013* | 0.001** | 0.000*** | 0.000*** |
| Utah |  |  | -- | 0.679 | 0.033* | 0.134 | 0.045* | 0.029* | 0.007** | 0.002** | 0.002** |
| North Carolina | |  |  | -- | 0.052 | 0.203 | 0.071 | 0.046* | 0.009** | 0.002** | 0.002** |
| Georgia |  |  |  |  | -- | 0.979 | 0.696 | 0.620 | 0.429 | 0.106 | 0.106 |
| South Carolina | |  |  |  |  | -- | 0.791 | 0.741 | 0.639 | 0.267 | 0.267 |
| Maryland |  |  |  |  |  |  | -- | 0.951 | 0.851 | 0.351 | 0.351 |
| Colorado |  |  |  |  |  |  |  | -- | 0.901 | 0.360 | 0.360 |
| New Jersey |  |  |  |  |  |  |  |  | -- | 0.344 | 0.344 |
| Alabama |  |  |  |  |  |  |  |  |  | -- | 1.000 |
| Wisconsin |  |  |  |  |  |  |  |  |  |  | -- |
|  | | | | | | | | | | | |

Note. Wald tests compared differences between states in the sum of the model H coefficients representing the change in slope observed between 2010 and 2012 compared to previous years + a state-level interaction with this variable.

| **Supplemental Table 5**. State-level difference in ASD prevalence in 2012: Results of Wald tests for final regression model (model H) | | | | | | | | | | | |
| --- | --- | --- | --- | --- | --- | --- | --- | --- | --- | --- | --- |
| State | Colorado | Wiscon-sin | Missouri | Arkan-sas | South Carolina | Arizona | Georgia | North Carolina | Utah | Mary-land | New Jersey |
| Alabama | 0.001*** | 0.000*** | 0.000*** | 0.000*** | 0.000*** | 0.000*** | 0.000*** | 0.000*** | 0.000*** | 0.000*** | 0.000*** |
| Colorado | -- | 0.9527 | 0.3832 | 0.2192 | 0.056 | 0.000*** | 0.000*** | 0.000*** | 0.000*** | 0.000*** | 0.000*** |
| Wisconsin |  | -- | 0.4264 | 0.2457 | 0.0709 | 0.000*** | 0.000*** | 0.000*** | 0.000*** | 0.000*** | 0.000*** |
| Missouri |  |  | -- | 0.6362 | 0.3432 | 0.000*** | 0.000*** | 0.000*** | 0.000*** | 0.000*** | 0.000*** |
| Arkansas |  |  |  | -- | 0.7388 | 0.009** | 0.002** | 0.000*** | 0.000*** | 0.000*** | 0.000*** |
| South Carolina | |  |  |  | -- | 0.006** | 0.001*** | 0.000*** | 0.000*** | 0.000*** | 0.000*** |
| Arizona |  |  |  |  |  | -- | 0.6809 | 0.07 | 0.044* | 0.038* | 0.000*** |
| Georgia |  |  |  |  |  |  | -- | 0.1128 | 0.0698 | 0.0571 | 0.000*** |
| North Carolina | |  |  |  |  |  |  | -- | 0.689 | 0.3759 | 0.000*** |
| Utah |  |  |  |  |  |  |  |  | -- | 0.5724 | 0.000*** |
| Maryland |  |  |  |  |  |  |  |  |  | -- | 0.000*** |
| New Jersey |  |  |  |  |  |  |  |  |  |  | -- |
|  | | | | | | | | | | | |

Note. Wald tests compared differences between states in the sum of all parameter relevant to the year 2012, including mean and state-level intercepts, mean and state-level slopes, and mean and state-level changes in slope applicable to the year 2012.Model projections are also included for Alabama, which did not participate in data collection in the year 2012.For this state, the model projects prevalence based on the intercept and growth rate between 2000 and 2010.
